# Supplementary material
Source: HighWire-hosted journal article supplement (https://bmjopengastro.bmj.com/content/8/1/e000695)
Supplement: inline-supplementary-material-3 [file inline-supplementary-material-3.pdf]

**Supplementary Table 3.** Factors associated with sepsis/bacteraemia among excluding one-day admissions

|                                                                  |                       | Excluding one-day admissions (N=55,825) |          |       |        |          |       |
|------------------------------------------------------------------|-----------------------|-----------------------------------------|----------|-------|--------|----------|-------|
|                                                                  |                       | OR                                      | (95% CI) |       | Adj-OR | (95% CI) |       |
| <b>Sex</b>                                                       | Male                  | Ref                                     |          |       | Ref    |          |       |
|                                                                  | Female                | 1.03                                    | 0.96     | 1.11  | 1.08   | 1.01     | 1.16  |
| <b>Age</b>                                                       | 20-49 years           | ref                                     |          |       | ref    |          |       |
|                                                                  | ≥ 50 years            | 1.05                                    | 0.98     | 1.14  | 0.99   | 0.91     | 1.07  |
| <b>Remoteness of residence</b>                                   | Major city            | ref                                     |          |       | ref    |          |       |
|                                                                  | Inner regional        | 1.20                                    | 1.10     | 1.30  | 1.12   | 1.03     | 1.23  |
|                                                                  | Outer regional        | 1.14                                    | 1.04     | 1.25  | 1.06   | 0.97     | 1.16  |
|                                                                  | Remote/very remote    | 1.57                                    | 1.37     | 1.81  | 1.44   | 1.25     | 1.67  |
| <b>Socioeconomic status</b>                                      | Q1 most affluent      | Ref                                     |          |       | Ref    |          |       |
|                                                                  | Q2                    | 0.95                                    | 0.83     | 1.09  | 0.95   | 0.83     | 1.09  |
|                                                                  | Q3                    | 1.16                                    | 1.02     | 1.31  | 1.12   | 0.98     | 1.27  |
|                                                                  | Q4                    | 1.26                                    | 1.11     | 1.41  | 1.18   | 1.05     | 1.34  |
|                                                                  | Q5 most disadvantaged | 1.29                                    | 1.15     | 1.44  | 1.18   | 1.05     | 1.33  |
| <b>Diabetes</b>                                                  |                       | 1.18                                    | 1.10     | 1.27  | 1.27   | 1.18     | 1.37  |
| <b>Alcohol</b>                                                   |                       | 1.42                                    | 1.33     | 1.52  | 1.49   | 1.39     | 1.59  |
| <b><u>Covariates adjusted for the above listed variables</u></b> |                       |                                         |          |       |        |          |       |
| <b>Charlson co-morbidity index</b>                               | 0                     | Ref                                     |          |       | Ref    |          |       |
|                                                                  | 1                     | 1.37                                    | 1.25     | 1.52  | 1.73   | 1.56     | 1.92  |
|                                                                  | 2                     | 1.68                                    | 1.53     | 1.84  | 2.53   | 2.27     | 2.81  |
|                                                                  | ≥3                    | 2.27                                    | 2.09     | 2.47  | 3.56   | 3.22     | 3.94  |
| <b><i>Complications of cirrhosis</i></b>                         |                       |                                         |          |       |        |          |       |
| <b>Hepatorenal syndrome</b>                                      |                       | 3.81                                    | 3.24     | 4.49  | 3.54   | 3.00     | 4.17  |
| <b>Hepatic encephalopathy</b>                                    |                       | 3.57                                    | 3.18     | 4.02  | 3.26   | 2.89     | 3.68  |
| <b>Variceal bleeding</b>                                         |                       | 1.34                                    | 1.23     | 1.46  | 1.28   | 1.18     | 1.39  |
| <b>Ascites</b>                                                   |                       | 1.80                                    | 1.68     | 1.93  | 1.72   | 1.60     | 1.85  |
| <b>Hepatocellular carcinoma</b>                                  |                       | 0.55                                    | 0.47     | 0.65  | 0.60   | 0.51     | 0.70  |
| <b><i>Infections</i></b>                                         |                       |                                         |          |       |        |          |       |
| <b>Urinary tract infection</b>                                   |                       | 4.48                                    | 4.12     | 4.87  | 4.63   | 4.25     | 5.05  |
| <b>Bacterial pneumonia/ Lower Respiratory tract infection</b>    |                       | 4.57                                    | 4.19     | 4.99  | 4.46   | 4.08     | 4.87  |
| <b>Aspiration Pneumonia</b>                                      |                       | 6.29                                    | 5.45     | 7.25  | 6.06   | 5.25     | 7.00  |
| <b>Spontaneous bacterial peritonitis</b>                         |                       | 6.38                                    | 5.45     | 7.48  | 6.11   | 5.20     | 7.17  |
| <b><i>Cirrhosis aetiology</i></b>                                |                       |                                         |          |       |        |          |       |
| <b>Chronic Hepatitis C</b>                                       |                       | 0.98                                    | 0.91     | 1.06  | 1.02   | 0.94     | 1.10  |
| <b>Chronic Hepatitis B</b>                                       |                       | 1.19                                    | 1.02     | 1.38  | 1.28   | 1.10     | 1.49  |
| <b>NAFLD/NASH</b>                                                |                       | 1.28                                    | 1.10     | 1.51  | 1.36   | 1.16     | 1.61  |
| <b>Primary sclerosing cholangitis</b>                            |                       | 6.05                                    | 4.94     | 7.41  | 7.54   | 6.13     | 9.28  |
| <b><i>Admission data</i></b>                                     |                       |                                         |          |       |        |          |       |
| <b>Length of stay</b>                                            | 1 day                 | --                                      |          |       | --     |          |       |
|                                                                  | 2-4 days              | Ref                                     |          |       | Ref    |          |       |
|                                                                  | 5-9 days              | 3.02                                    | 2.71     | 3.37  | 3.00   | 2.69     | 3.35  |
|                                                                  | 10-19 days            | 7.60                                    | 6.82     | 8.47  | 7.54   | 6.77     | 8.41  |
|                                                                  | 20-29 days            | 12.77                                   | 11.20    | 14.56 | 12.60  | 11.04    | 14.37 |

|  |          |  |       |       |       |       |       |       |
|--|----------|--|-------|-------|-------|-------|-------|-------|
|  | 30+ days |  | 19.57 | 17.40 | 22.02 | 19.24 | 17.08 | 21.66 |
|--|----------|--|-------|-------|-------|-------|-------|-------|

Note: Reference group (Ref); Adjusted odds ratio (Adj-OR)
